# Supplementary material for: Disease aetiology and progression shape the inter-patient multi-omics profile of clear cell renal carcinoma
Source: Research Square preprint supplement (doi:10.21203/rs.3.rs-3891211/v1), 2024-02-13
Supplement: Supplementary file 1 [file 39defaf29d28e5b76603e2fd.xlsx]

## Sheet: Table2
Table 2. Association between factor 1 and biological age-related variable across TCGA cohorts
Factor 1 (Mitotic Clock)	Beta	SE	P-value
SBS1 (N=7,464)
All TCGA, except KIRC	0.0951894	0.0120266	2.84e-15
Age-Adjusted Epigenetic Mitotic Clock (epiTOC2) (N=7,721)
All TCGA, except KIRC*	0.765538	0.007123	<1.00E-307
WGS-Telomere length ratio, log2(tTL:nTL) (N=588)
All TCGA, except KIRC	-0.101249	0.044025	0.02182
Altered Copy Number Fraction (N=7,141)
All TCGA, except KIRC	0.0609539	0.0138075	1.03e-05
Homologous Recombination Repair Deficiency (N=6,989)
All TCGA, except KIRC	-0.0011846	0.0146682	0.936
The joint model also excluded TCGA-SKCM and TCGA-KIRC.
Factor1 was inferred using the most informative features of the observed factor1 selected by LASSO regression model.
The model was Factor1 ~ Biological age-related metrics + age at diagnosis + TCGA-cohort.
Beta estimates represented one unit per s.d.
*Value < 1E-307, which is the lowest float number that could be represented
