# Supplementary material for: Disease aetiology and progression shape the inter-patient multi-omics profile of clear cell renal carcinoma
Source: Research Square preprint supplement (doi:10.21203/rs.3.rs-3891211/v1), 2024-02-13
Supplement: Supplementary file 2 [file d831e8b341b80b5c3894206a.xlsx]

## Sheet: Table1
Table 1. Association between factors 1-6 and epidemiological data of ccRCC patients
Discovery set (N=151)
Variables	Factor1		Factor2		Factor3		Factor4		Factor5		Factor6
	Beta±SE	P-value	Beta±SE	P-value	Beta±SE	P-value	Beta±SE	P-value	Beta±SE	P-value	Beta±SE	P-value
Social-demographic variables
Age at Diagnosis	0.17±0.09	0.0446986	0.00±0.08	0.958959	0.00±0.08	0.990101	0.01±0.08	0.908409	0.06±0.09	0.480338	0.02±0.09	0.771589
Sex (Male)	0.17±0.17	0.315662	0.47±0.17	0.00577826	-0.01±0.16	0.971113	-0.32±0.17	0.228621	0.10±0.17	0.586294	-0.43±0.17	0.0132606
Prognostic variables
Stage (III+IV)	0.79±0.17	1.03991e-05	0.65±0.17	0.000260676	0.10±0.17	0.568078	0.15±0.18	0.423195	0.64±0.18	0.000513379	-0.10±0.18	0.601699
Grade (III+IV)	0.51±0.17	0.00236951	0.63±0.16	9.89796e-05	0.08±0.16	0.607769	-0.08±0.17	0.641291	0.67±0.16	6.93971e-05	-0.02±0.17	0.929355
Main risk factors
Body Mass Index (kg/m2)	-0.15±0.08	0.0725103	-0.08±0.08	0.336854	0.01±0.08	0.873199	0.00±0.08	0.953776	-0.14±0.08	0.105334	0.07±0.08	0.430326
Hypertension (Yes)	-0.10±0.18	0.57725	-0.10±0.18	0.552065	-0.11±0.17	0.507514	0.15±0.18	0.398146	0.03±0.18	0.872938	0.01±0.18	0.967918
Diabetes (Yes)	-0.14±0.25	0.569805	-0.25±0.24	0.306157	-0.01±0.23	0.974681	0.15±0.24	0.52892	0.34±0.25	0.167408	0.13±0.25	0.59817
History of RCC (Yes)	0.61±0.37	0.100993	-0.21±0.37	0.558582	-0.52±0.35	0.142534	-0.46±0.37	0.206952	-0.03±0.38	0.945538	-0.03±0.37	0.927472
Tobacco Smoking (Ever)	0.04±0.17	0.81177	0.26±0.16	0.122978	-0.21±0.16	0.188845	-0.05±0.17	0.761563	0.32±0.17	0.0637831	0.73±0.16	8.73266e-06
Alcohol drinking (Ever)	0.13±0.21	0.535265	-0.15±0.21	0.461704	-0.48±0.20	0.0170705	-0.09±0.21	0.654691	0.16±0.22	0.468803	-0.07±0.21	0.748114
Kidney function related variables
Creatinine (mg/dL)	0.01±0.09	0.935091	0.07±0.09	0.455101	0.12±0.09	0.158414	-0.08±0.09	0.330301	-0.03±0.09	0.781379	-0.19±0.09	0.0379439
Cystatin C (mg/dL)	0.10±0.09	0.278002	0.02±0.09	0.781893	-0.03±0.09	0.713184	0.05±0.09	0.607549	0.02±0.09	0.844	0.11±0.09	0.25437
Validation sets (N=324/TCGA-KIRCa; N=462/IARC-ccRCCb)
Variables	Factor1a		Factor2b		Factor3b		Factor4b		Factor5a		Factor6a
	Beta ± SE	P-value	Beta ± SE	P-value	Beta ± SE	P-value	Beta ± SE	P-value	Beta ± SE	P-value	Beta ± SE	P-value
Social-demographic variables
Age at Diagnosis	0.23±0.05	2e-05	0.10±0.05	0.030	0.05±0.05	0.290	0.01±0.05	0.838	0.03±0.05	0.478	0.36±0.09	4.69E-04
Sex (Male)	0.38±0.11	0.00063	0.49±0.09	3.70E-07	0.02±0.09	0.841	0.09±0.09	0.323	0.08±0.10	0.387	-0.55±0.11	9.64E-07
Prognostic variables
Tumour Stage (III+IV)	0.89±0.10	5.81E-18	0.45±0.09	2.31E-06	-0.01±0.10	0.907	0.11±0.09	0.240	0.50±0.10	3.39E-07	-0.46±0.12	1.00E-04
Tumour Grade (III+IV)	0.68±0.10	7.50E-11	0.47±0.10	1.36E-06	-0.05±0.10	0.593	0.21±0.10	0.025	0.58±0.10	5.34E-09	-0.24±0.10	0.022
Main risk factors
Body Mass Index (kg/m2)	Missing	Missing	0.02±0.05	0.620	0.00±0.05	0.985	-0.06±0.05	0.204	0.01±0.05	0.821	Missing	Missing
Hypertension (Yes)	Missing	Missing	0.03±0.09	0.742	-0.01±0.09	0.881	0.01±0.09	0.940	0.07±0.10	0.477	Missing	Missing
Diabetes (Yes)	Missing	Missing	0.00±0.15	0.992	-0.13±0.15	0.374	-0.08±0.14	0.579	-0.22±0.16	0.173	Missing	Missing
History of RCC (Yes)	Missing	Missing	Missing	Missing	Missing	Missing	Missing	Missing	Missing	Missing	Missing	Missing
Tobacco Smoking (Ever)	-0.20±0.23	0.395	-0.11±0.10	0.274	0.00±0.10	0.971	0.02±0.10	0.836	-0.20±0.10	0.049	0.13±0.09	0.158
Alcohol drinking (Ever)	Missing	Missing	-0.12±0.10	0.249	-0.01±0.10	0.943	-0.08±0.10	0.446	-0.09±0.11	0.381	Missing	Missing
accRCC tumour samples (TCGA-KIRC); bccRCC tumour samples (IARC) studies with available transcriptome data.
'Missing' means data were not available; bold-flagged cells highlighted the associations that were replicated.
Base model: Factor ~ variable + sex+ age at diagnosis+country.
Estimates of continuous variables (Factors, age at diagnosis, and body mass index) as value per standard deviation.
Binary variables were categorized as follows: Ever/Never (tobacco smoking and alcohol drinking),
Yes/No (hypertension, diabetes, family history of kidney cancer/RCC), II+IV/I+II (pathological tumour grade and stage).
Country variable not applicable to TCGA-KIRC since all cases from USA.
Limited data in the validation set related to tobacco smoking (TCGA-KIRC: 39 never, 30 ever smokers, 255 missing).
More details about frequencies of these variables in Table S1.
Tumour stage and tumour grade grouped into two categories due to small sample size in the discovery set (Table S2).
